# Supplementary material for: Forcing Versus Feedback: Epidemic Malaria and Monsoon Rains in Northwest India
Source: PubMed Central journal article supplement (PMC2932675; doi:10.1371/journal.pcbi.1000898), 2010-09-02
Supplement: pcbi.1000898.s014.pdf [file pcbi.1000898.s014.pdf]

**Table S1. Table of log-likelihood ( $\ell$ ) and AIC of the fitted models for Kutch and Barmer.**

| model                                                     | p  | log-likelihood ( $\ell$ ) |        | AIC    |        |
|-----------------------------------------------------------|----|---------------------------|--------|--------|--------|
|                                                           |    | Kutch                     | Barmer | Kutch  | Barmer |
| VSEIRS model without rainfall                             | 19 | -1275.0                   | -984.1 | 2588.0 | 2006.2 |
| VSEIRS model with rainfall                                | 20 | -1265.0                   | -978.6 | 2570.0 | 1997.2 |
| $VS^2EI^2$ model without rainfall                         | 24 | -1261.1                   | -975.3 | 2570.2 | 1998.6 |
| $VS^2EI^2$ model with rainfall                            | 25 | -1251.0                   | -970.5 | 2552.0 | 1991.0 |
| SARIMA $(1, 0, 1) \times (1, 0, 1)_{12}$ without rainfall | 6  | -1329.0                   | -983.7 | 2670.0 | 1979.4 |
| SARIMA $(1, 0, 1) \times (1, 0, 1)_{12}$ with rainfall    | 7  | -1322.6                   | -977.0 | 2659.2 | 1968.0 |

In the table “ $p$ ” denotes the number of parameters for each model. AIC is computed by the formula  $AIC = -2\ell + 2p$ . The SARIMA model was fitted to the data on the log scale (see the supplement of [2] for a detailed description of this procedure).
