# Supplementary material for: Forcing Versus Feedback: Epidemic Malaria and Monsoon Rains in Northwest India
Source: PubMed Central journal article supplement (PMC2932675; doi:10.1371/journal.pcbi.1000898), 2010-09-02
Supplement: pcbi.1000898.s015.pdf [file pcbi.1000898.s015.pdf]

**Table S2. List of symbols for the malaria model.**

| symbol                | description                                                                                               | unit              | estimated? (y/n) |
|-----------------------|-----------------------------------------------------------------------------------------------------------|-------------------|------------------|
| $\mu_{XY}$            | per-capita rate of transition from compartment $X$ to $Y$ ; $X, Y \in \{S, E, I, R, I_1, I_2, S_1, S_2\}$ | $\text{yr}^{-1}$  | y                |
| $\beta_i$             | $i$ th spline coefficient                                                                                 | -                 | y                |
| $\bar{\beta}$         | dimensionality constant                                                                                   | yr                | n                |
| $\tau$                | mean development delay for mosquitoes                                                                     | yr                | y                |
| $\sigma$              | sd of the process noise                                                                                   | $\text{yr}^{1/2}$ | y                |
| $\rho$                | reporting fraction                                                                                        | -                 | y                |
| $n_\lambda$           | shape parameter for the delay development kernel for mosquitoes                                           | -                 | n                |
| $\Delta$              | time step for stochastic Euler integration                                                                | day               | n                |
| $1/\delta$            | average human life expectancy                                                                             | yr                | n                |
| $\sigma_{\text{obs}}$ | sd of the observation noise                                                                               | -                 | y                |
| $\beta_r$             | coefficient of climate (rainfall) covariate                                                               | $\text{mm}^{-1}$  | y                |
| $X_0$                 | initial fraction of people in compartment $X$ ; $X \in \{S, E, I, R, I_1, I_2, S_1, S_2\}$                | -                 | y                |
| $\kappa_0, \lambda_0$ | Initial values for the latent and current force of infection                                              | -                 | y                |
| $q$                   | Infectivity of quiescent cases relative to full-blown infections                                          | -                 | y                |
| $c$                   | Proportionality constant for superinfection                                                               | -                 | y                |

Fixed parameters are  $\bar{\beta} = 1\text{yr}^{-1}$ ,  $n_\lambda = 1$ ,  $\Delta = 1$  day and  $1/\delta = 50$  yr.
