# Supplementary material for: Forcing Versus Feedback: Epidemic Malaria and Monsoon Rains in Northwest India
Source: PubMed Central journal article supplement (PMC2932675; doi:10.1371/journal.pcbi.1000898), 2010-09-02
Supplement: pcbi.1000898.s016.pdf [file pcbi.1000898.s016.pdf]

**Table S3. Estimated model parameters for Kutch.**

|                       | Kutch                  |                            |                     |                         | confidence interval  |
|-----------------------|------------------------|----------------------------|---------------------|-------------------------|----------------------|
|                       | VSEIRS<br>without rain | $VS^2EI^2$<br>without rain | VSEIRS<br>with rain | $VS^2EI^2$<br>with rain |                      |
| $\mu_{IR}$            | 13.587                 | –                          | 39.021              | –                       | ( – , – )            |
| $\mu_{RS}$            | 0.116                  | –                          | 5.657               | –                       | ( – , – )            |
| $\mu_{S_2S_1}$        | –                      | 0.230                      | –                   | 0.334                   | ( 0.067 , 3.270 )    |
| $\mu_{EI}$            | 7.301                  | 7.408                      | 10.480              | 8.902                   | ( 8.885 , 17.277 )   |
| $\mu_{I_1I_2}$        | –                      | 11.544                     | –                   | 5.511                   | ( 3.218 , $\infty$ ) |
| $\mu_{I_2S_2}$        | –                      | 0.004                      | –                   | 0.035                   | ( 0 , 0.073 )        |
| $\mu_{I_1S_1}$        | –                      | 2.320                      | –                   | 6.563                   | ( 0 , $\infty$ )     |
| $\beta_1$             | -0.076                 | -2.469                     | 1.242               | 1.201                   | ( -4.819 , 4.109 )   |
| $\beta_2$             | 1.287                  | 2.001                      | 3.590               | 2.088                   | ( -0.153 , 6.616 )   |
| $\beta_3$             | 4.446                  | 4.227                      | 3.906               | 3.866                   | ( 1.874 , 6.939 )    |
| $\beta_4$             | 2.868                  | 2.786                      | 3.747               | 2.808                   | ( 1.092 , 6.042 )    |
| $\beta_5$             | 6.709                  | 6.534                      | 5.742               | 5.996                   | ( 4.695 , 9.749 )    |
| $\beta_6$             | 6.319                  | 7.080                      | 4.803               | 5.333                   | ( 3.912 , 8.287 )    |
| $\tau$                | 0.025                  | 0.022                      | 0.033               | 0.030                   | ( 0.015 , 0.084 )    |
| $\sigma$              | 0.347                  | 0.309                      | 0.225               | 0.243                   | ( 0.162 , 0.259 )    |
| $\rho$                | 0.022                  | 0.030                      | 0.005               | 0.015                   | ( 0.007 , 0.025 )    |
| $q \times 10^4$       | –                      | 4.763                      | –                   | 9.424                   | ( 0.100 , 48.102 )   |
| $\sigma_{obs}$        | 0.384                  | 0.390                      | 0.390               | 0.395                   | ( 0.365 , 0.445 )    |
| $\beta_r$             | –                      | –                          | 0.489               | 0.512                   | ( 0.270 , 0.765 )    |
| $S_0$                 | 0.494                  | –                          | 0.956               | –                       | ( – , – )            |
| $S_{1.0}$             | –                      | 0.164                      | –                   | 0.138                   | ( 0.001 , 0.900 )    |
| $E_0$                 | 0.003                  | 0.002                      | 0.014               | 0.004                   | ( 0.003 , 0.009 )    |
| $I_0$                 | 0.011                  | –                          | 0.002               | –                       | ( – , – )            |
| $I_{1.0}$             | –                      | 0.002                      | –                   | 0.002                   | ( 0 , 0.087 )        |
| $I_{2.0}$             | –                      | 0.067                      | –                   | 0.080                   | ( 0 , 0.754 )        |
| $R_0$                 | 0.505                  | –                          | 0.038               | –                       | ( – , – )            |
| $S_{2.0}$             | –                      | 0.765                      | –                   | 0.775                   | ( 0.276 , 0.900 )    |
| $\kappa_0 \times 10$  | 0.079                  | 0.133                      | 0.189               | 0.171                   | ( 0 , $\infty$ )     |
| $\lambda_0 \times 10$ | 0.050                  | 0.045                      | 0.058               | 0.061                   | ( 0 , $\infty$ )     |
| $c$                   | –                      | 0.004                      | –                   | 0.010                   | ( 0.001 , 0.067 )    |

Corresponding units and parameter descriptions are given in Table S2. The columns marked VSEIRS and  $VS^2EI^2$  correspond to maximum likelihood point estimates for each type of model, with and without including rainfall. The last two columns give the lower and upper bounds for approximate 95% confidence intervals for the  $VS^2EI^2$  model with rainfall, derived from profile likelihood computations as shown in Figures S7 and S8; values of 0, 1 and  $\infty$  correspond to confidence intervals extending to the boundary of the parameter space.
