# Supplementary material for: Forcing Versus Feedback: Epidemic Malaria and Monsoon Rains in Northwest India
Source: PubMed Central journal article supplement (PMC2932675; doi:10.1371/journal.pcbi.1000898), 2010-09-02
Supplement: pcbi.1000898.s017.pdf [file pcbi.1000898.s017.pdf]

Table S4. Point estimates for estimated parameters of the VSEIRS model with and without rainfall for Barmer district.

|                | Barmer              |                        |
|----------------|---------------------|------------------------|
|                | VSEIRS<br>with rain | VSEIRS<br>without rain |
| $\mu_{IR}$     | 39.153              | 41.164                 |
| $\mu_{RS}$     | 1.009               | 0.253                  |
| $\mu_{EI}$     | 26.802              | 24.604                 |
| $\beta_1$      | -3.318              | -2.884                 |
| $\beta_2$      | 7.477               | 7.578                  |
| $\beta_3$      | 3.057               | 3.030                  |
| $\beta_4$      | 3.296               | 3.441                  |
| $\beta_5$      | 7.453               | 7.918                  |
| $\beta_6$      | 3.525               | 4.038                  |
| $\tau$         | 0.083               | 0.079                  |
| $\sigma$       | 0.290               | 0.324                  |
| $\rho$         | 0.017               | 0.029                  |
| $\sigma_{obs}$ | 0.613               | 0.598                  |
| $\beta_r$      | 0.324               |                        |
| $S_0$          | 0.995               | 0.950                  |
| $E_0$          | 0.000               | 0.000                  |
| $I_0$          | 0.000               | 0.000                  |
| $R_0$          | 0.005               | 0.051                  |
| $\kappa_0$     | 0.000               | 0.000                  |
| $\lambda_0$    | 0.000               | 0.000                  |

Corresponding description and units are given in Table S2.
